# Supplementary material
Source: Springer Nature journal article supplement (https://www.springermedizin.de/resource/supplementary/12885_2008_1532_MOESM11_ESM.pdf/9472252)

# Additional file 11.

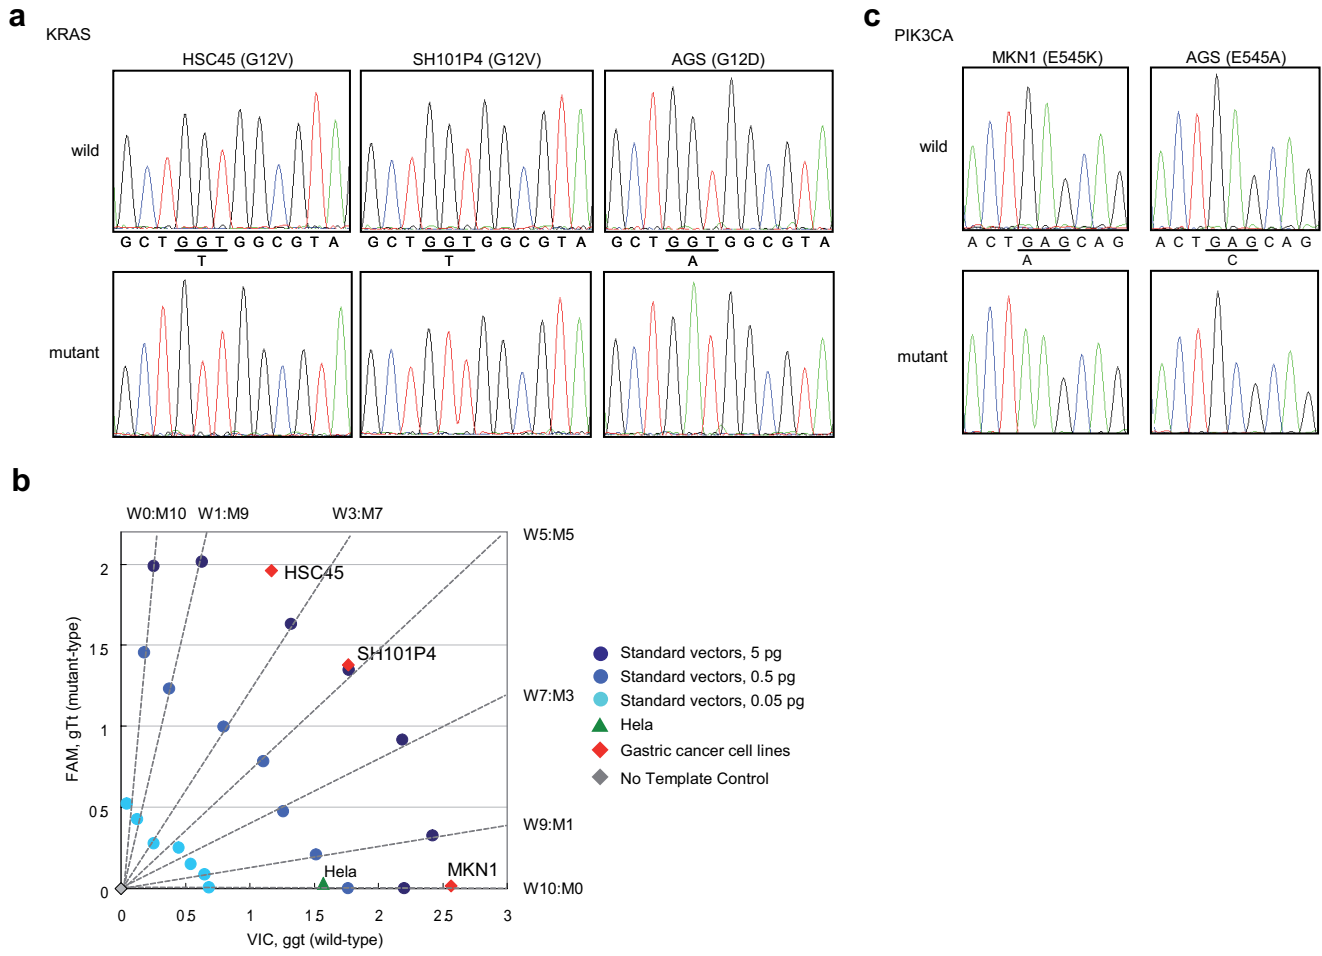

Supplement: MOESM11 [file 9472252]
